# Supplementary material for: Extracellular matrix mimetic supramolecular hydrogels reinforced with covalent crosslinked mesoporous silica nanoparticles
Source: Royal Society of Chemistry journal article supplement (doi:10.1039/d4tb00499j), 2024-01-01
Supplement: d4tb00499j1.pdf [file d4tb00499j1.pdf]

## Supporting Information

### Extracellular matrix mimetic supramolecular hydrogels reinforced with covalent crosslinked mesoporous silica nanoparticles

Aygül Zengin<sup>#</sup>, Shazad Hafeez<sup>#</sup>, Pamela Habibovic, Matthew Baker, and Sabine van Rijt<sup>\*</sup>

<sup>1</sup>Department of Instructive Biomaterials Engineering, MERLN Institute for Technology-Inspired Regenerative Medicine, Maastricht University, P.O. Box 616, 6200 MD Maastricht, The Netherlands

<sup>#</sup> authors contributed equally to this work

<sup>\*</sup> Corresponding author: Sabine van Rijt: [s.vanrijt@maastrichtuniversity.nl](mailto:s.vanrijt@maastrichtuniversity.nl)

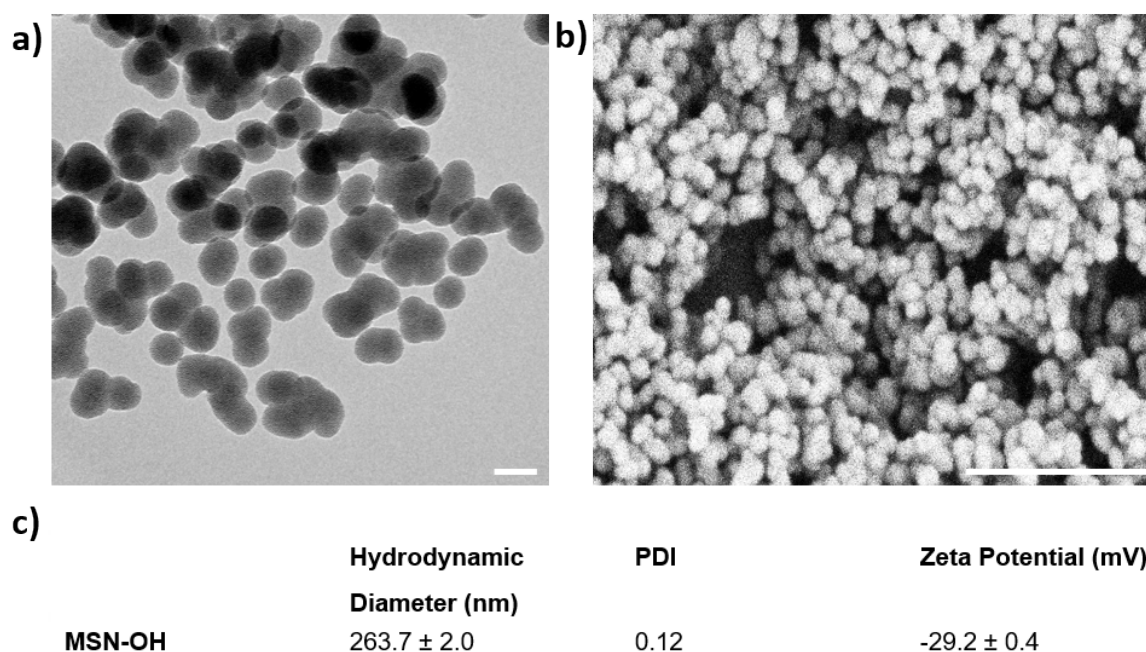

**Fig. S1:** Characterization of the synthesized MSN-OHs. (a) TEM imaging of MSN-OH (Scale bar: 50 nm); (b) SEM imaging of MSN-OH (Scale bar: 1 μM); (c) Hydrodynamic size and zeta potential of MSN-OHs.

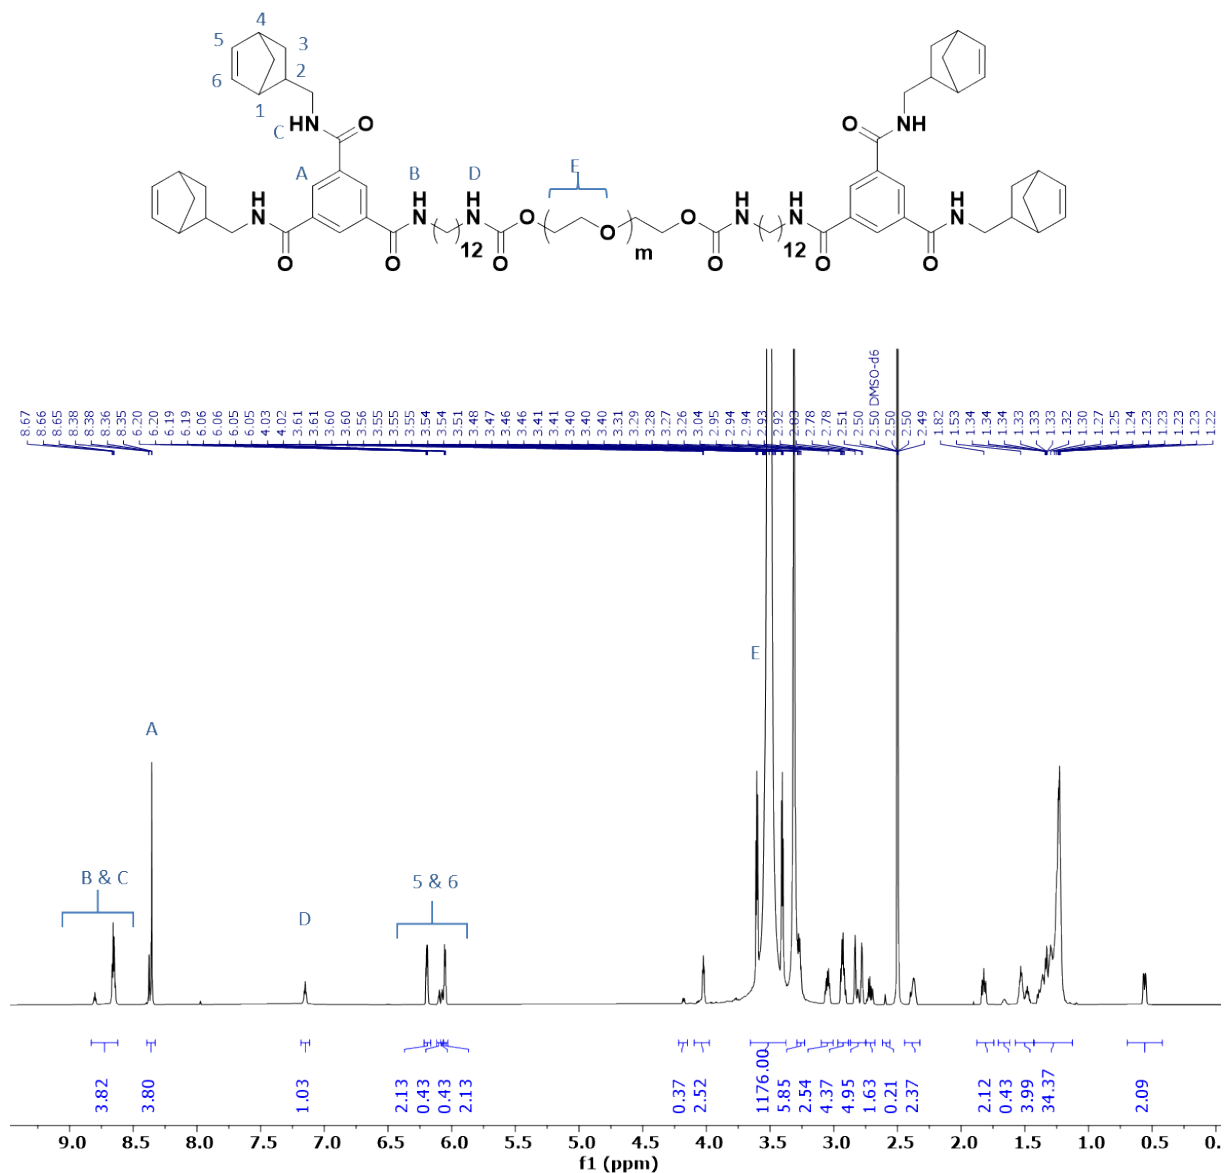

Fig. S2 <sup>1</sup>H NMR data of NBTA macromonomers

Table S1: Weight average (*M<sub>w</sub>*), number average (*M<sub>n</sub>*), and polydispersity (*Đ*) of the starting material (PEG 20K) and the final NBTA macromonomer.

| Sample name | M <sub>w</sub> (Daltons) | M <sub>n</sub> (Daltons) | Polydispersity ( <i>Đ</i> ) |
|-------------|--------------------------|--------------------------|-----------------------------|
| PEG 20K     | 35368                    | 31747                    | 1.11                        |
| NBTA        | 47607                    | 45583                    | 1.04                        |

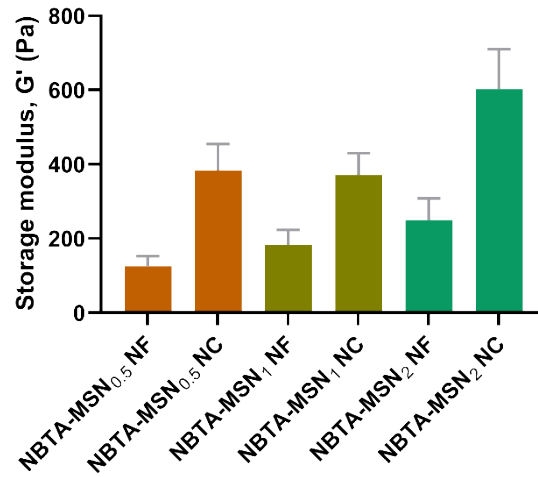

**Fig. S3** The storage modulus of NBTA-MSN<sub>0.5</sub>, NBTA-MSN<sub>1</sub>, and NBTA-MSN<sub>2</sub> hydrogels before UV light exposure where MSNs act as nanofillers (NF) and after UV light exposure as allowing MSNs to crosslink (NC)

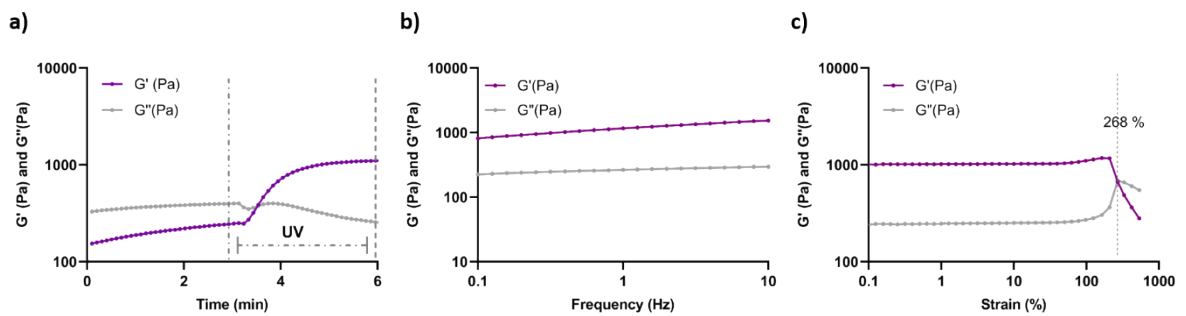

**Fig. S4** *In situ* photorheological characterization of NBTA-MSN-CaP<sub>1</sub> supramolecular nanocomposites. (a) Time sweep test of NBTA-MSN- CaP<sub>1</sub>; (b) Frequency sweep test of NBTA-MSN- CaP<sub>1</sub>; (c) Strain sweep test of NBTA-MSN-CaP<sub>1</sub>

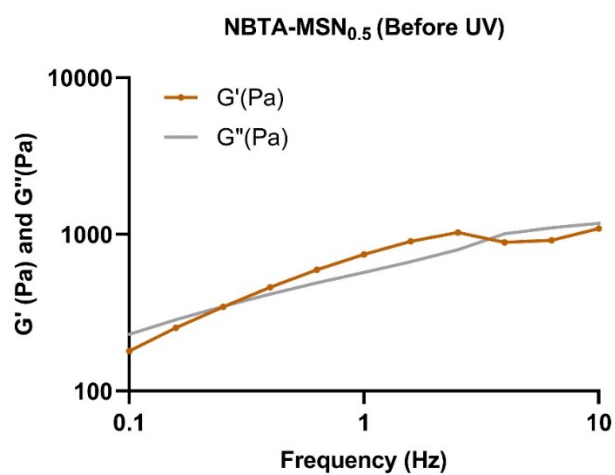

**Fig. S5** Frequency sweep of NBTA-MSN<sub>0.5</sub> supramolecular nanocomposite hydrogel before crosslinking. The frequency sweep test showed a typical viscoelastic behavior.

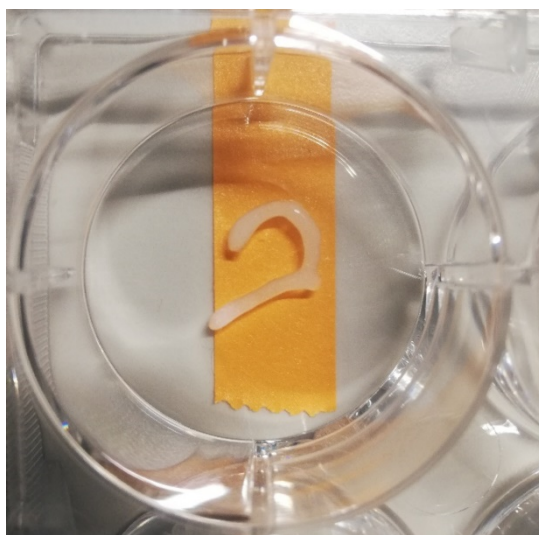

**Fig. S6.** Injectability of NBTA-MSN<sub>1</sub> nanocomposite hydrogels through the 19-Gauge syringe needle

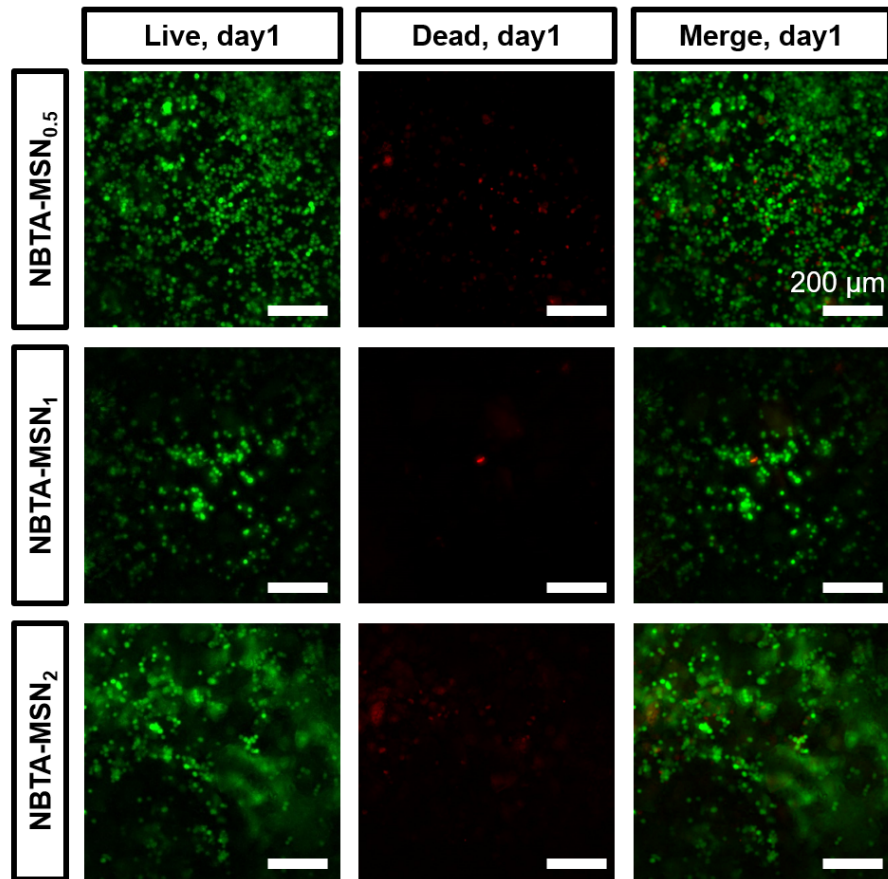

**Fig. S7** Viability of encapsulated MG63 cells inside NBTA-MSN<sub>0.5</sub>, NBTA-MSN<sub>1</sub> and NBTA-MSN<sub>2</sub> hydrogels at day 1. The representative images of encapsulated cells stained with calcein AM (Green = live cells) and ethidium homodimer (EthD-1, red = dead cells). Scale bar: 200  $\mu$ m

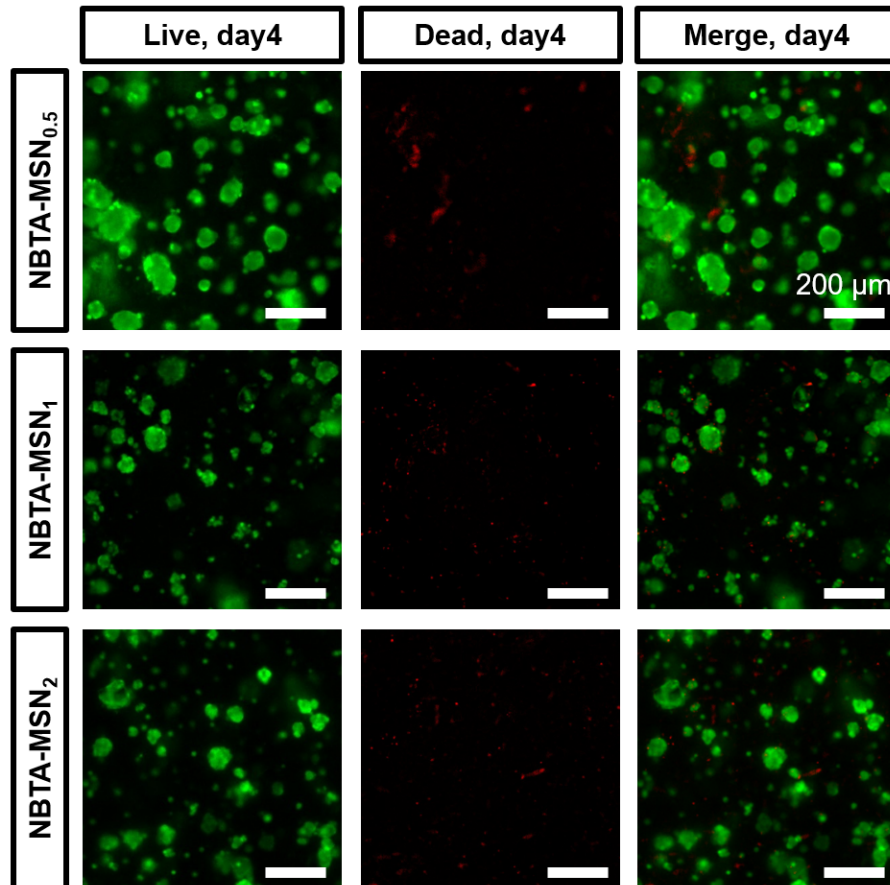

**Fig. S8** Viability of encapsulated MG63 cells inside NBTA-MSN<sub>0.5</sub>, NBTA-MSN<sub>1</sub> and NBTA-MSN<sub>2</sub> hydrogels at day 4. The representative images of encapsulated cells stained with calcein AM (Green = live cells) and ethidium homodimer (EthD-1, red = dead cells). Scale bar: 200  $\mu$ m

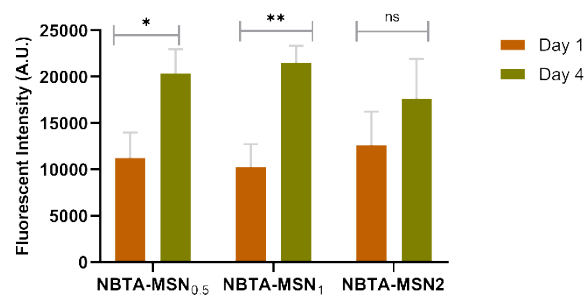

**Fig. S9** Metabolic activity of MG63 cells encapsulated NBTA-MSN<sub>0.5</sub>, NBTA-MSN<sub>1</sub>, NBTA-MSN<sub>2</sub> hydrogels during 4 days incubation in cell culture media. The data are presented as the mean  $\pm$  SD for 3 replicates. Two-way ANOVA followed by Turkey's multiple comparison test was used, \*  $P < 0.05$ ; \*\*  $P < 0.01$ ; ns = not significant

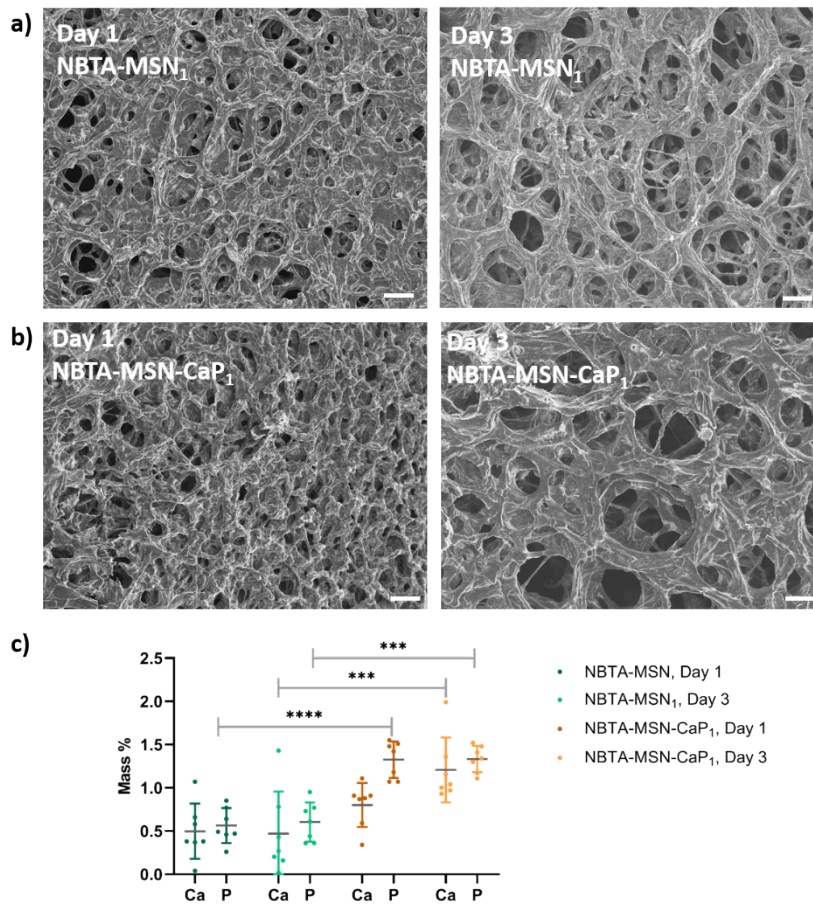

**Fig. S10** In vitro mineralization of NBTA-MSN<sub>1</sub> and NBTA-MSN-CaP<sub>1</sub> hydrogels in m-SBF buffer for 1 day and 3 days. (a) SEM image of freeze-dried NBTA-MSN<sub>1</sub> hydrogels after 1 day (left) and 3 days (right) of incubation in m-SBF buffer. (b) SEM images of freeze-dried NBTA-MSN-CaP<sub>1</sub> hydrogels after 1 day (left) and 3 days (right) of incubation in m-SBF buffer. (c) EDX analysis of Ca and P ions within freeze-dried NBTA-MSN<sub>1</sub> and NBTA-MSN-CaP<sub>1</sub> hydrogels (n=7). Scale bar for SEM images: 100 $\mu$ m on the left and 10  $\mu$ m on the right. The data are presented as the mean  $\pm$  SD for 7 sample areas. Two-way ANOVA followed by Turkey's multiple comparison test was used, \* P; \*\*\*p=0.002, \*\*\*\*p<0.0001

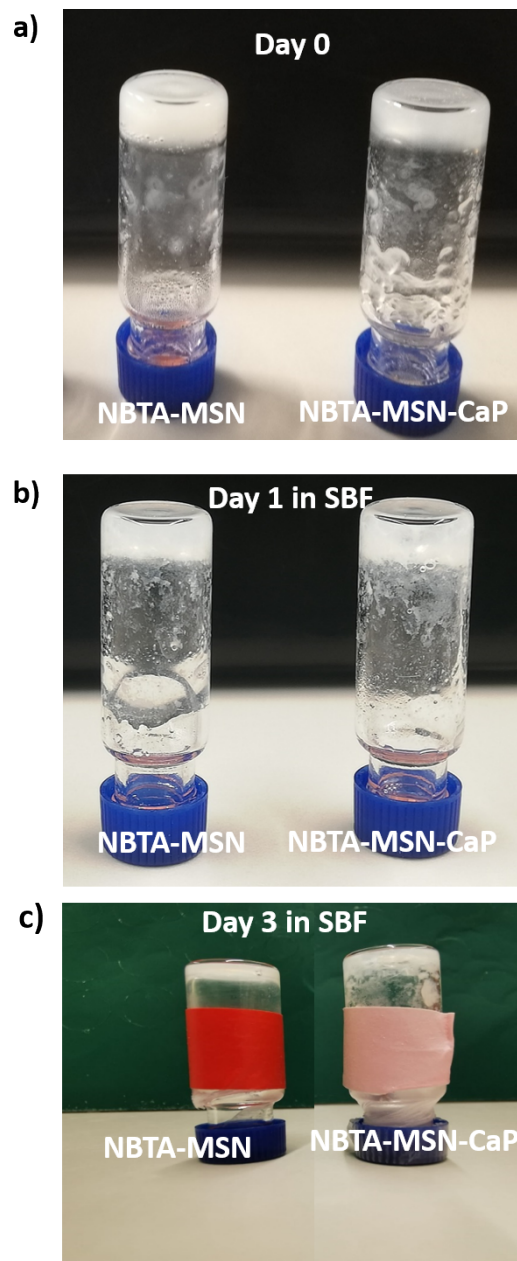

**Fig. S11.** Photographs of NBTA-MSN<sub>1</sub> and NBTA-MSN-CaP<sub>1</sub> nanocomposites (a) before SBF incubation, (b) after 1 day of incubation, and (c) 3 days of incubation in SBF buffer.
